# Supplementary material for: Lycopene coupled ‘trifoliate’ polyaniline nanofibers as multi-functional biomaterial
Source: Royal Society of Chemistry journal article supplement (doi:10.1039/c2jm32530f), 2012-01-01
Supplement: c2jm32530f.pdf [file c2jm32530f.pdf]

### Electronic supplementary image

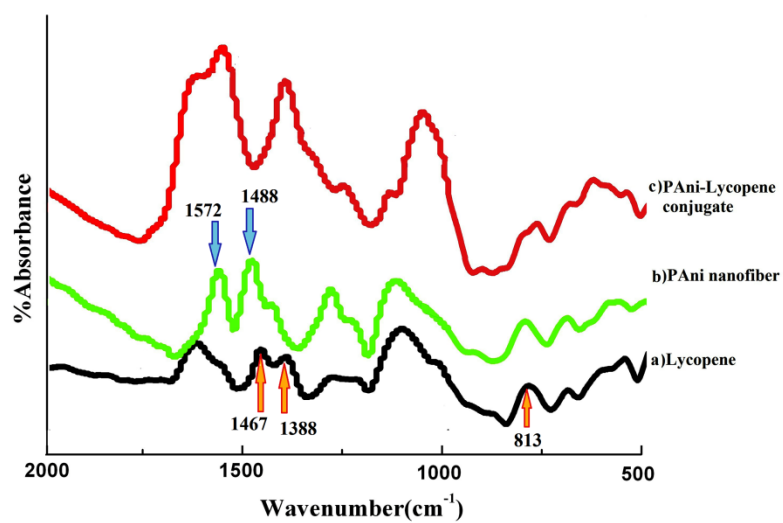

**Fig. S1** FTIR spectra of a) lycopene, b) PANi nanofiber and c) PANi-lycopene conjugated system
